# Supplementary material for: Interpretable per case weighted ensemble method for cancer associations
Source: PubMed Central journal article supplement (PMC4952276; doi:10.1186/s12864-016-2647-9), 2016-07-19
Supplement: 12864_2016_2647_MOESM1_ESM.pdf [file 12864_2016_2647_MOESM1_ESM.pdf]

# Interpretable per Case Weighted Ensemble Method for Cancer Associations: Supplementary material 2

Adrin Jalali, Nico Pfeifer

## 1 Method

SVM modified objective function [2]:

$$\min_{\mathbf{w}, \mathbf{w}_0} \left\{ \frac{1}{2} \|\mathbf{w}\|^2 + \frac{1}{2} \beta \sum_{(j,k) \in E} (w_j - w_k)^2 \right\}$$

s.t.:

$$\forall i \in \{1, \dots, n\} : (\mathbf{w}\mathbf{x}_i + \mathbf{w}_0)\mathbf{y}_i \geq 1$$

Dual Problem:

$$\max_{\alpha} \left\{ \sum_{i=1}^n \alpha_i - \frac{1}{2} \sum_{i=1}^n \sum_{j=1}^n \alpha_i \alpha_j \mathbf{y}_i \mathbf{y}_j (\mathbf{x}_i^T \mathbf{L})(\mathbf{L}^T \mathbf{x}_j) \right\}$$

$$\mathbf{L}\mathbf{L}^T = (\mathbf{I} + \beta\mathbf{B})^{-1}$$

s.t.:

$$\forall i \in \{1, \dots, n\} : \sum_{i=1}^n \alpha_i \mathbf{y}_i = \mathbf{0}$$

$$\forall i \in \{1, \dots, n\} : \alpha_i \geq 0$$

Laplacian matrix:

$$\mathbf{B} = \mathbf{D} - \mathbf{A}$$

Dual to Primal:

$$\mathbf{w} = (\mathbf{I} + \beta\mathbf{B})^{-1} \sum_{i=1}^n \alpha_i \mathbf{y}_i \mathbf{x}_i$$

Our approach is summarized as:

- Reverse engineer the learned machine to extract important genes after using the network information.
- Solve SVM problem for original and transformed data.

- Calculate  $\mathbf{w}$  for both models.
- Compute for each pair of nodes, for each model:  

$$\text{Score}(i, j) = \frac{|w_i| + |w_j|}{2} \times e^{-\max(d_G(i, j), 1)}$$
- Report pairs with highest scores for both trained models.

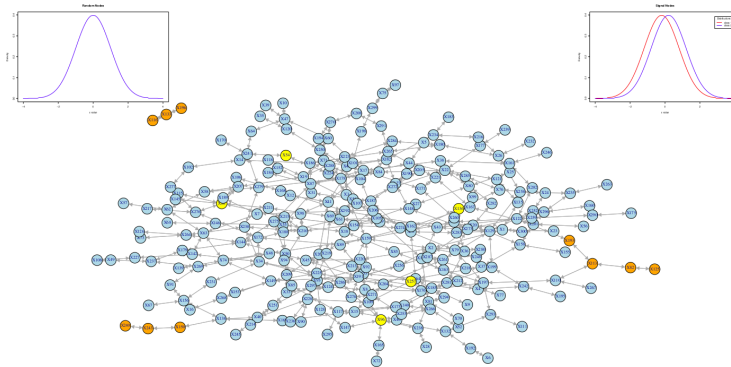

Figure 1: **Blue**: random gene, **Orange**: Signal node being a member of a pathway of signal nodes, **Yellow**: A lonely signal node

Fig. 1 shows an example of our random network. We select values of corresponding genes for nodes as follows:

- Signal nodes (genes):  $f(\mathbf{n}) = \begin{cases} N(-\mu, 1) & \text{if } \mathbf{n} \text{ is in class 1} \\ N(\mu, 1) & \text{if } \mathbf{n} \text{ is in class 2} \end{cases}$
- Random nodes (non-informative genes):  $f(\mathbf{n}) = N(0, 1)$

## 2 Results

Figures 2, 3, and 4 present the effect of the relative location of signal (predictive) nodes on the selected features. We present how a normal SVM would select features and compare that to the selected features of NICK method. We observe that although NICK performs better on the synthesized data in terms of performance measures, but it uses non-predictive features as predictive pathways move deep into the network. We observe the same effect of having the bias towards nodes that are not connected to the network on real data as well. Figure 5 presents selected features and their degree on the corresponding used graph.

## 3 References

1. van't Veer, Laura J., et al. "Gene expression profiling predicts clinical outcome of breast cancer." *nature* 415.6871 (2002): 530-536.

2. Lavi, Ofer, Gideon Dror, and Ron Shamir. "Network-induced classification kernels for gene expression profile analysis." *Journal of Computational Biology* 19.6 (2012): 694-709.

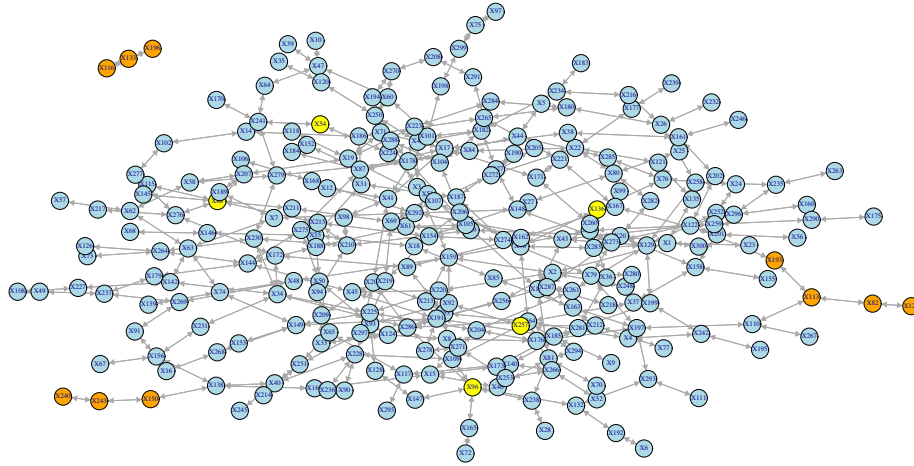

(a) Corresponding network

| Original |      |      |      | Transformed |      |      |      |
|----------|------|------|------|-------------|------|------|------|
| X196     | X196 | X53  | X53  | X196        | X196 | X233 | X233 |
| X233     | X233 | X39  | X39  | X196        | X133 | X133 | X133 |
| X88      | X88  | X196 | X133 | X133        | X116 | X116 | X116 |
| X116     | X116 | X127 | X127 | X95         | X95  | X240 | X240 |
| X197     | X197 | X127 | X148 | X39         | X39  | X240 | X243 |
| X148     | X148 | X150 | X150 | X59         | X59  | X106 | X106 |
| X148     | X273 | X116 | X133 | X243        | X243 | X106 | X168 |
| X160     | X160 | X96  | X96  | X114        | X114 | X168 | X168 |
| X95      | X95  | X273 | X273 | X243        | X150 | X56  | X56  |
| X88      | X115 | X40  | X40  | X39         | X47  | X298 | X298 |
| X53      | X8   | X53  | X164 | X150        | X150 | X247 | X247 |
| X195     | X195 | X56  | X56  | X125        | X125 | X83  | X83  |

(b) Discovered nodes (no NICK)

(c) Discovered nodes (NICK)

|                      |           |
|----------------------|-----------|
| AUC (Original):      | 60.6      |
| AUC (Transformed):   | 62.4      |
| wc p-value (paired): | 5.669e-09 |

(d) Performance measures

Figure 2: An easy example: here all signal pathways are on the border of the network.

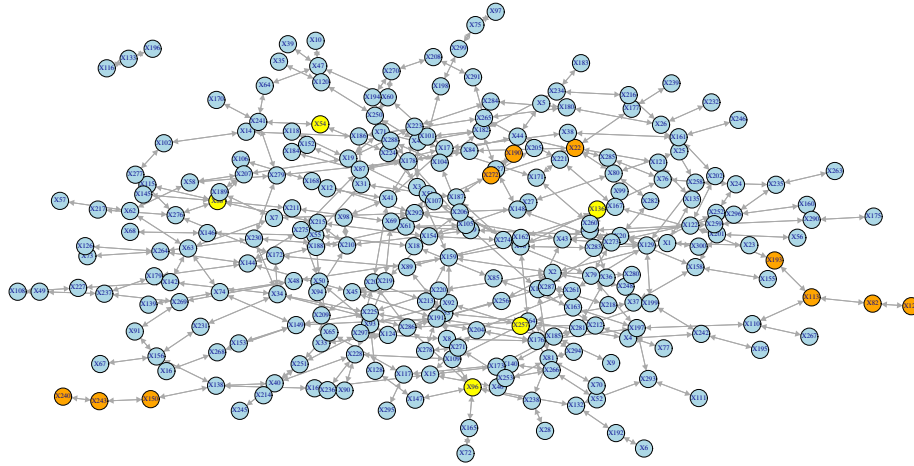

(a) Corresponding network

| Original |      |      |      | Transformed |      |      |      |
|----------|------|------|------|-------------|------|------|------|
| X190     | X190 | X104 | X104 | X233        | X233 | X190 | X190 |
| X233     | X233 | X190 | X272 | X112        | X112 | X240 | X240 |
| X277     | X277 | X88  | X88  | X190        | X272 | X240 | X243 |
| X190     | X127 | X165 | X165 | X86         | X86  | X243 | X243 |
| X272     | X272 | X272 | X22  | X243        | X150 | X190 | X127 |
| X106     | X106 | X165 | X96  | X150        | X150 | X272 | X272 |
| X150     | X150 | X250 | X250 | X246        | X246 | X298 | X298 |
| X88      | X215 | X22  | X22  | X106        | X106 | X125 | X125 |
| X51      | X51  | X28  | X28  | X35         | X35  | X125 | X82  |
| X73      | X73  | X35  | X35  | X247        | X247 | X272 | X69  |
| X162     | X162 | X113 | X113 | X272        | X22  | X82  | X82  |
| X112     | X112 | X277 | X102 | X100        | X100 | X257 | X257 |

(b) Discovered nodes (no NICK)

(c) Discovered nodes (NICK)

|                      |           |
|----------------------|-----------|
| AUC (Original):      | 60.1      |
| AUC (Transformed):   | 61.5      |
| wc p-value (paired): | 1.383e-06 |

(d) Performance measures

Figure 3: A medium example: here some signal pathways are on the border of the network.

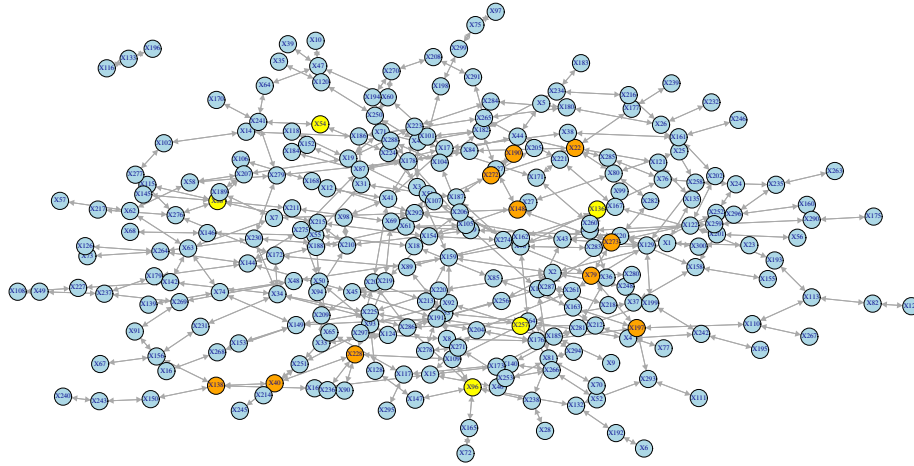

(a) Corresponding network

| Original |      |      |      | Transformed |      |      |      |
|----------|------|------|------|-------------|------|------|------|
| X190     | X190 | X101 | X101 | X233        | X233 | X190 | X190 |
| X233     | X233 | X190 | X272 | X112        | X112 | X190 | X272 |
| X88      | X88  | X297 | X297 | X86         | X86  | X190 | X127 |
| X190     | X127 | X93  | X93  | X272        | X272 | X272 | X205 |
| X26      | X26  | X138 | X138 | X205        | X205 | X146 | X146 |
| X272     | X272 | X272 | X22  | X146        | X68  | X68  | X68  |
| X101     | X41  | X123 | X123 | X298        | X298 | X272 | X22  |
| X22      | X22  | X101 | X198 | X90         | X90  | X127 | X127 |
| X146     | X146 | X228 | X228 | X100        | X100 | X272 | X69  |
| X278     | X278 | X72  | X72  | X297        | X297 | X72  | X72  |
| X88      | X115 | X96  | X96  | X127        | X148 | X155 | X155 |
| X148     | X148 | X112 | X112 | X247        | X247 | X196 | X196 |

(b) Discovered nodes (no NICK)

(c) Discovered nodes (NICK)

|                      |           |
|----------------------|-----------|
| AUC (Original):      | 60.2      |
| AUC (Transformed):   | 62.5      |
| wc p-value (paired): | 8.151e-13 |

(d) Performance measures

Figure 4: A hard example: here none of the signal pathways are on the border of the network.

| Original |        | NICK   |        |
|----------|--------|--------|--------|
| Node     | Degree | Node   | Degree |
| 85453    | 12     | 9917   | 0      |
| 6605     | 98     | 84279  | 0      |
| 56886    | 26     | 197370 | 0      |
| 10640    | 16     | 51143  | 0      |
| 8817     | 152    | 58475  | 0      |
| 56894    | 28     | 55585  | 0      |
| 5733     | 150    | 25949  | 0      |
| 57758    | 8      | 54892  | 0      |
| 7532     | 86     | 126695 | 0      |
| 51       | 172    | 57168  | 0      |
| 7566     | 16     | 10456  | 0      |
| 3267     | 56     | 148223 | 0      |
| 89953    | 4      | 9742   | 0      |
| 5713     | 126    | 253558 | 0      |
| 5193     | 32     | 342527 | 0      |
| 5365     | 70     | 10175  | 0      |
| 10874    | 132    | 83930  | 0      |
| 5982     | 172    | 57035  | 0      |
| 92140    | 20     | 145482 | 0      |
| 332      | 328    | 57465  | 0      |

(a) Discovered nodes (no NICK)      (b) Discovered nodes (NICK)

Figure 5: Comparison of selected nodes on van 't veer data [1] using NICK and a normal SVM.
