# Supplementary material for: Interpretable per case weighted ensemble method for cancer associations
Source: PubMed Central journal article supplement (PMC4952276; doi:10.1186/s12864-016-2647-9), 2016-07-19

# Supplementary Material 1 for: Interpretable per Case Weighted Ensemble Method for Cancer Associations

Adrin Jalali, Nico Pfeifer

## 1 Method's Performance

The following plots represent the performance of our method with respect to different regularization levels, from highly regularized to less regularized.

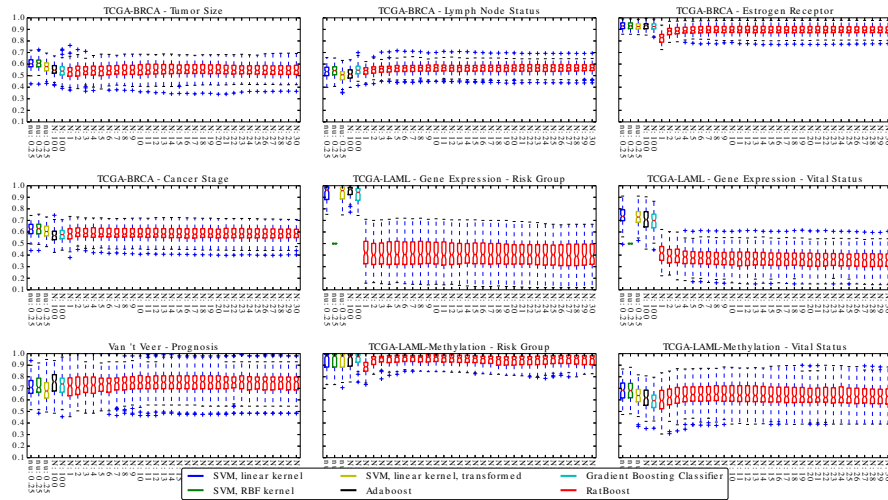

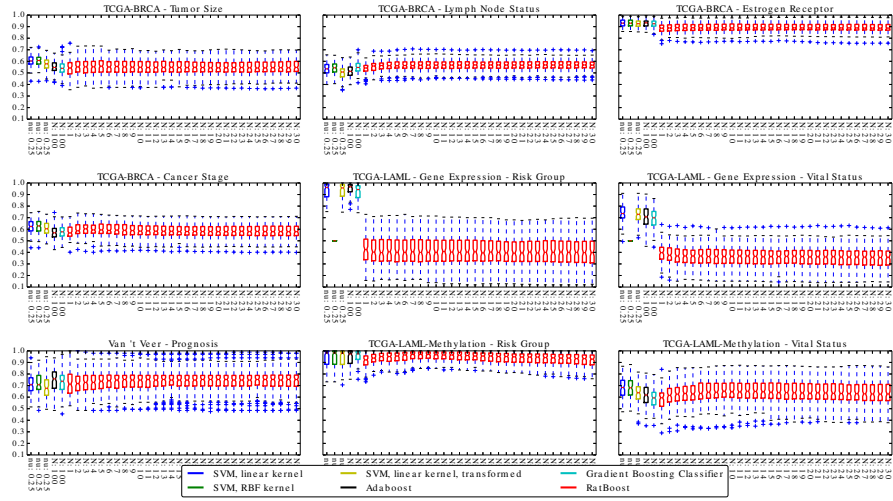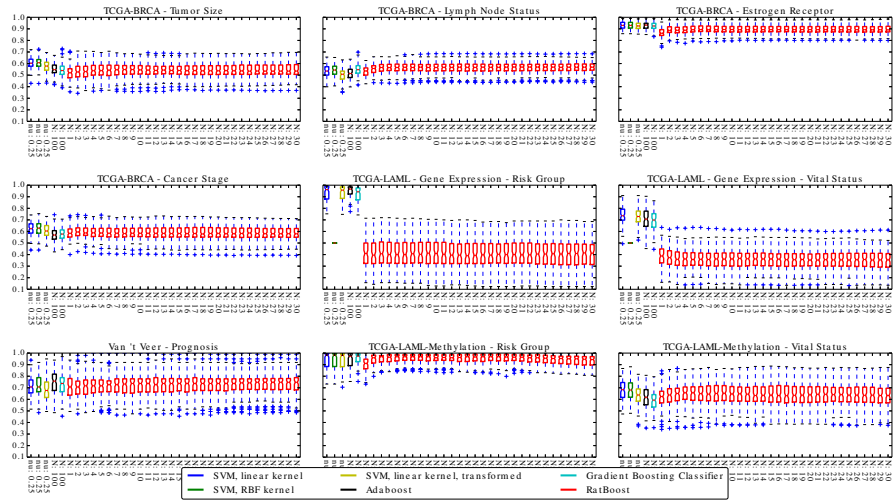

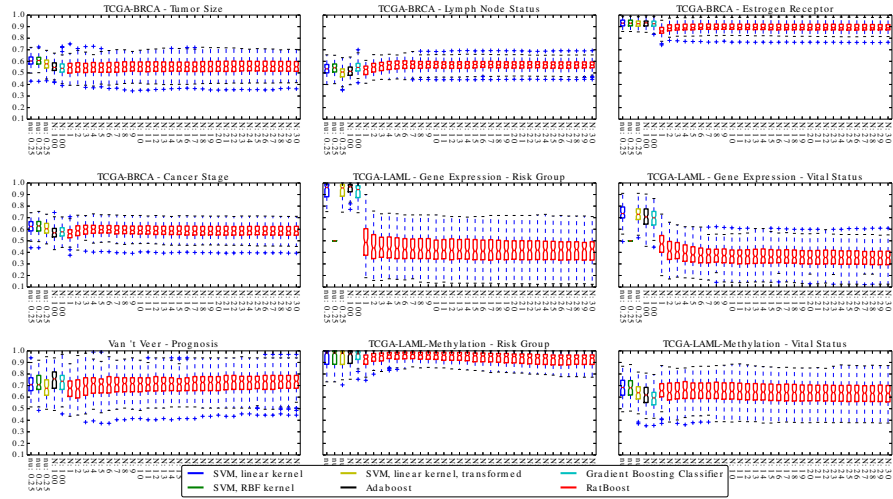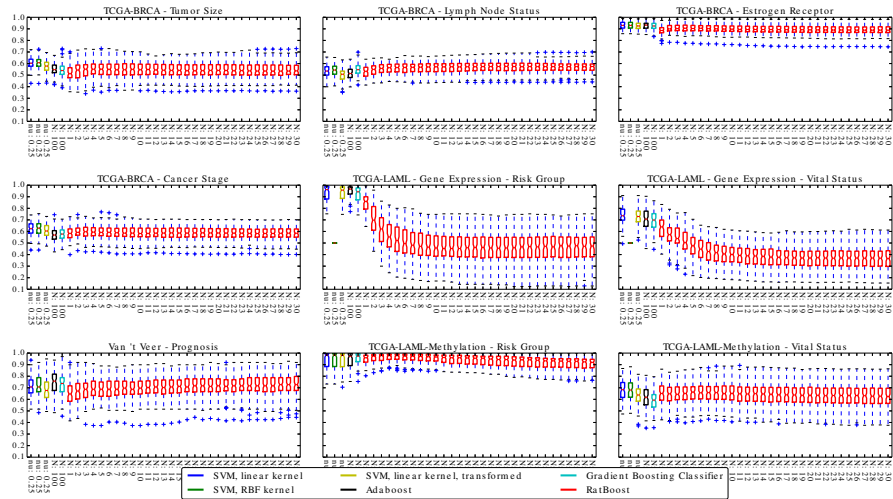

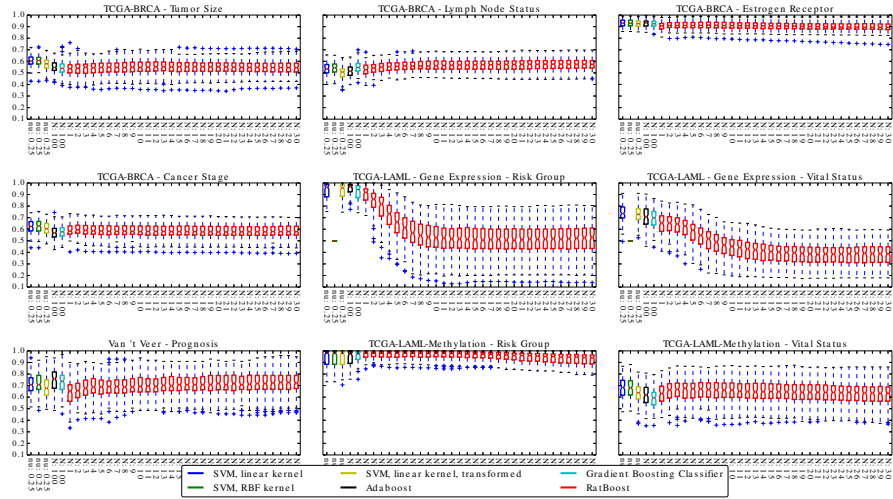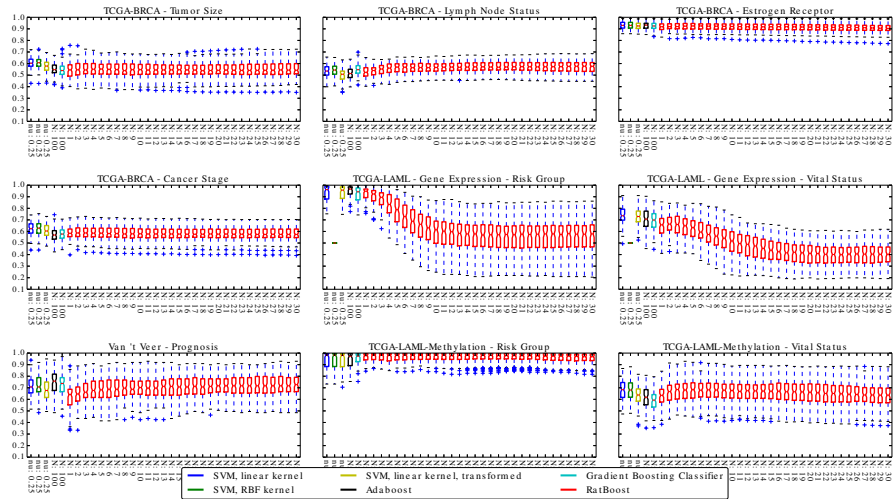

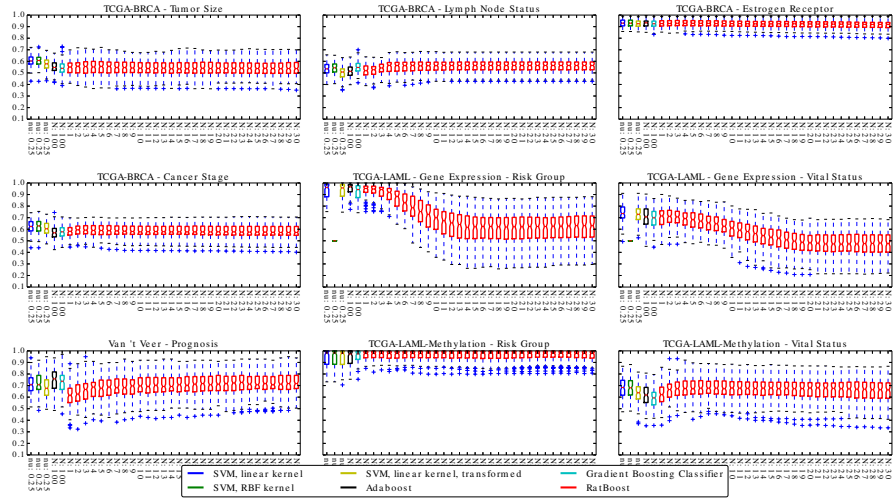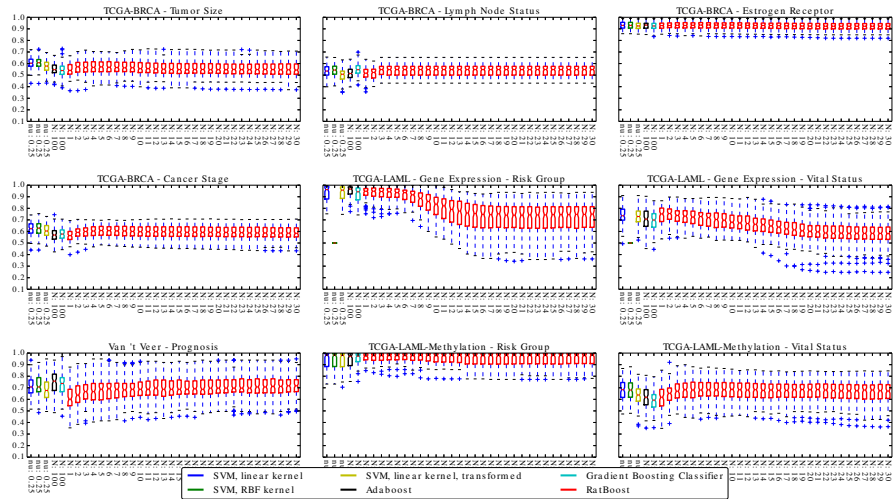

Supplement: 12864_2016_2647_MOESM2_ESM.pdf [file 12864_2016_2647_MOESM2_ESM.pdf]
